# Supplementary material for: Microglial autofluorescence in the brain and retina is dynamically modulated by systemic inflammation
Source: Research Square preprint supplement (doi:10.21203/rs.3.rs-8575608/v1), 2026-01-23
Supplement: Supplementary file 1 [file cf7b6545cda8cef452090f8b.docx]

Graphical Abstract

Short title:

Retina as a window into brain inflammation

Legend:

We hypothesized that brain autofluorescence would change with inflammation and this would be reflected in similar changes detectable in retina. We found inflammation-associated autofluorescence changes in both brain and retina but that the dynamics of this differ depending upon region.
